## **Cryo-EM Structure of the 2019-nCoV Spike in the Prefusion Conformation**

Daniel Wrapp<sup>1\*</sup>, Nianshuang Wang<sup>1\*</sup>, Kizzmekia S. Corbett<sup>2</sup>, Jory A. Goldsmith<sup>1</sup>, Ching-Lin Hsieh<sup>1</sup>, Olubukola Abiona<sup>2</sup>, Barney S. Graham<sup>2</sup>, Jason S. McLellan<sup>1#</sup>

<sup>1</sup>Department of Molecular Biosciences, The University of Texas at Austin, Austin, TX 78712, USA.

<sup>2</sup>Vaccine Research Center, National Institute of Allergy and Infectious Diseases, National Institutes of Health, Bethesda, MD 20892, USA.

\*These authors contributed equally

#Correspondence to [jmclellan@austin.utexas.edu](mailto:jmclellan@austin.utexas.edu) (J.S.M.)

1 **Abstract**

2 The outbreak of a novel betacoronavirus (2019-nCov) represents a pandemic threat that has been  
3 declared a public health emergency of international concern. The CoV spike (S) glycoprotein is a  
4 key target for urgently needed vaccines, therapeutic antibodies, and diagnostics. To facilitate  
5 medical countermeasure (MCM) development we determined a 3.5 Å-resolution cryo-EM  
6 structure of the 2019-nCoV S trimer in the prefusion conformation. The predominant state of the  
7 trimer has one of the three receptor-binding domains (RBDs) rotated up in a receptor-accessible  
8 conformation. We also show biophysical and structural evidence that the 2019-nCoV S binds  
9 ACE2 with higher affinity than SARS-CoV S. Additionally we tested several published SARS-  
10 CoV RBD-specific monoclonal antibodies and found that they do not have appreciable binding to  
11 nCoV-2019 S, suggesting antibody cross-reactivity may be limited between the two virus RBDs.  
12 The atomic-resolution structure of 2019-nCoV S should enable rapid development and evaluation  
13 of MCMs to address the ongoing public health crisis.

14           The novel coronavirus 2019-nCoV has recently emerged as a human pathogen in the city  
15 of Wuhan in China’s Hubei province, causing fever, severe respiratory illness and pneumonia (1,  
16 2). According to the World Health Organization on February 10<sup>th</sup>, 2020, there have been over  
17 40,000 confirmed cases globally, leading to at least 900 deaths. The new pathogen was rapidly  
18 shown to be a novel member of the betacoronavirus genus that is closely related to several bat  
19 coronaviruses as well as severe acute respiratory syndrome coronavirus (SARS-CoV) (3, 4).  
20 Compared to SARS-CoV, 2019-nCoV appears to be more readily transmitted from human-to-  
21 human, spreading to multiple continents and leading to the WHO declaration of a Public Health  
22 Emergency of International Concern (PHEIC) (1, 5, 6).

23           2019-nCoV makes use of a densely glycosylated, homotrimeric class I fusion spike (S)  
24 protein to gain entry into host cells. The S protein exists in a metastable prefusion conformation  
25 that undergoes a dramatic structural rearrangement to fuse the viral membrane with the host cell  
26 membrane (7, 8). This process is triggered by binding of the S1 subunit to a host-cell receptor,  
27 which destabilizes the prefusion trimer, resulting in shedding of the S1 subunit and transition of  
28 the S2 subunit to a highly stable postfusion conformation (9). In order to engage a host-cell  
29 receptor, the receptor-binding domain (RBD) of S1 undergoes hinge-like conformational  
30 movements that transiently hide or expose the determinants of receptor binding. These two states  
31 are referred to as the “down” conformation and the “up” conformation, where “down”  
32 corresponds to the receptor-inaccessible state and “up” corresponds to the receptor-accessible  
33 state, which is thought to be less stable (10-13). Due to the indispensable function of the S  
34 protein it represents a vulnerable target for antibody-mediated neutralization, and  
35 characterization of the prefusion S structure would provide atomic-level information to guide  
36 vaccine design and development.

37           Based on the reported genome sequence of 2019-nCoV(4), we expressed ectodomain  
38 residues 1–1208 of 2019-nCoV S (**Figure 1A, Supplementary Figure 1**), adding two stabilizing  
39 proline mutations in the C-terminal S2 fusion machinery based on a previous stabilization  
40 strategy which proved highly effective for betacoronavirus S proteins (11, 14). We obtained  
41 roughly 0.5 mg/L of the recombinant prefusion-stabilized S ectodomain from FreeStyle 293  
42 cells, and the protein was purified to homogeneity by affinity chromatography and size-exclusion  
43 chromatography (**Supplementary Figure 1**). Cryo-EM grids were prepared using this purified,  
44 fully glycosylated S protein and preliminary screening revealed a high particle density with little  
45 aggregation near the edges of the holes.

46           After collecting and processing 3,207 micrograph movies, we obtained a 3.5 Å-resolution  
47 3D reconstruction of an asymmetrical trimer in which a single RBD was observed in the “up”  
48 conformation. (**Figure 1B, Supplementary Figure 2**). Due to the small size of the RBD (~21  
49 kDa), the asymmetry of this conformation was not readily apparent until *ab initio* 3D  
50 reconstruction and 3D classification were performed (**Figure 1B, Supplementary Figure 3**). By  
51 using the 3D variability feature in cryoSPARC v2 (15), we were able to observe breathing of the  
52 S1 subunits as the RBD underwent a hinge-like movement, which likely contributed to the  
53 relatively poor local resolution of S1 compared to the more stable S2 subunit (**Supplementary**  
54 **Movies 1 and 2**). This seemingly stochastic RBD movement has been captured during structural  
55 characterization of the closely related betacoronaviruses SARS-CoV and MERS-CoV, as well as  
56 the more distantly related alphacoronavirus porcine epidemic diarrhea virus (PEDV)(10, 11, 13,  
57 16). The observation of this phenomenon in 2019-nCoV S suggests that it shares the same  
58 mechanism of triggering that is thought to be conserved among the *Coronaviridae*, wherein

59 receptor-binding to exposed RBDs leads to an unstable 3 RBD-up conformation that results in  
60 shedding of S1 and refolding of S2 (11, 12).

61 Because the S2 subunit appeared to be a symmetric trimer, we performed a 3D  
62 refinement imposing C3 symmetry, resulting in a 3.2 Å-resolution map, with excellent density  
63 for the S2 subunit. Using both maps we built the vast majority of the 2019-nCoV S ectodomain,  
64 including glycans at 44 of the 66 N-linked glycosylation sites per trimer (**Supplementary Figure**  
65 **4**). Our final model spans S residues 27–1146, with several flexible loops omitted. Like all  
66 previously reported coronavirus S ectodomain structures, the density for 2019-nCoV S begins to  
67 fade after the connector domain (CD), reflecting the flexibility of the heptad repeat 2 (HR2)  
68 domain in the prefusion conformation (**Supplementary Figure 4A**) (13, 16-18).

69 The overall structure of 2019-nCoV S resembles that of SARS-CoV S, with a root mean  
70 square deviation (RMSD) of 3.8 Å over 959 C $\alpha$  atoms. The largest discrepancy between these  
71 two structures is a conformational difference between the positions of the RBDs in their  
72 respective “down” conformations (**Figure 2A**). Whereas the SARS-CoV RBD in the “down”  
73 conformation packs tightly against the N-terminal domain (NTD) of the neighboring protomer,  
74 the 2019-nCoV RBD in the “down” conformation is angled closer to the central cavity of the  
75 homotrimer. Despite this observed conformational difference, when the individual structural  
76 domains of 2019-nCoV S are aligned to their counterparts from SARS-CoV S, they reflect the  
77 high degree of structural homology between the two proteins, with the NTDs, RBDs,  
78 subdomains 1 and 2 (SD1 and SD2) and S2 subunits yielding RMSD values of 2.6 Å, 3.0 Å, 2.7  
79 Å and 2.0 Å, respectively (**Figure 2B**).

80 2019-nCoV S shares roughly 96% sequence identity with the S protein from the bat  
81 coronavirus RaTG13, with the most notable variation arising from an insertion in the S1/S2

82 protease cleavage site that results in an “RRAR” furin recognition site in 2019-nCoV, rather than  
83 the single arginine in SARS-CoV (**Supplementary Figure 5**) (19-22). A similar phenomenon  
84 has been observed for influenza viruses, where amino acid insertions that create a polybasic furin  
85 site in a related position in influenza hemagglutinin proteins are often found in highly virulent  
86 avian and human influenza viruses (23). In addition to this insertion of residues in the S1/S2  
87 junction, 29 variant residues exist between 2019-nCoV S and RaTG13 S, with 17 of these  
88 positions mapping to the RBD (**Supplementary Figures 5 and 6**). We also analyzed the 61  
89 available 2019-nCoV S sequences in GISAID and found that there were only 9 amino acid  
90 substitutions among all deposited sequences. Most of these substitutions are relatively  
91 conservative and they are not expected to have a dramatic effect on the structure or function of  
92 the 2019-nCoV S protein (**Supplementary Figure 6**).

93         Recent reports demonstrating that 2019-nCoV S and SARS-CoV S share the same  
94 functional host-cell receptor—angiotensin-converting enzyme 2 (ACE2) (21, 24-26)—prompted  
95 us to quantify the kinetics mediating this interaction via surface plasmon resonance (SPR).  
96 Surprisingly, ACE2 bound to 2019-nCoV S ectodomain with ~15 nM affinity, which is  
97 approximately 10- to 20-fold higher affinity than ACE2 binding to SARS-CoV S (**Figure 3A**,  
98 **Supplementary Figure 7**) (14). We also formed a complex of ACE2 bound to the 2019-nCoV S  
99 ectodomain and observed it by negative-stain EM, where it strongly resembled the complex  
100 formed between SARS-CoV S and ACE2, which has been observed at high-resolution by cryo-  
101 EM (**Figure 3B**) (14, 27). The high affinity of 2019-nCoV S for human ACE2 may contribute to  
102 the apparent ease with which 2019-nCoV can spread from human-to-human(1), however  
103 additional studies are needed to investigate this possibility.

104           The overall structural homology and shared receptor usage between SARS-CoV S and  
105 2019-nCoV S prompted us to test published SARS-CoV RBD-directed monoclonal antibodies  
106 (mAbs) for cross-reactivity to the 2019-nCoV RBD (**Figure 4A**). A 2019-nCoV RBD-SD1  
107 fragment (S residues 319–591) was recombinantly expressed, and appropriate folding of this  
108 construct was validated by measuring ACE2 binding using biolayer interferometry (BLI)  
109 (**Figure 4B**). Cross-reactivity of the SARS-CoV RBD-directed mAbs S230, m396 and 80R was  
110 then evaluated by BLI (12, 28-30). Despite the relatively high degree of structural homology  
111 between the 2019-nCoV RBD and the SARS-CoV RBD, no binding to the 2019-nCoV RBD  
112 could be detected for any of the three mAbs at the concentration tested (1  $\mu$ M) (**Figure 4C**,  
113 **Supplementary Figure 8**). Although the epitopes of these three antibodies represent a relatively  
114 small percentage of the surface area of the 2019-nCoV RBD, the lack of observed binding  
115 suggests that SARS-directed mAbs will not necessarily be cross-reactive and that future antibody  
116 isolation and therapeutic design efforts will benefit from using 2019-nCoV S proteins as probes.

117           The rapid global spread of 2019-nCoV, prompting the PHEIC declaration by WHO  
118 signals the urgent need for coronavirus vaccines and therapeutics. Knowing the atomic-level  
119 structure of the spike will support precision vaccine design and discovery of antivirals,  
120 facilitating medical countermeasure development.

## 121 **Materials and Methods**

### 122 *Protein expression and purification*

123 To express the prefusion S ectodomain, a gene encoding residues 1–1208 of 2019-nCoV S  
124 (GenBank: MN908947) with proline substitutions at residues 986 and 987, a “GSAS”  
125 substitution at the furin cleavage site (residues 682–685), a C-terminal T4 fibritin trimerization  
126 motif, an HRV3C protease cleavage site, a TwinStrepTag and an 8XHisTag was synthesized and  
127 cloned into the mammalian expression vector p $\alpha$ H. To express the 2019-nCoV RBD-SD1,  
128 residues 319–591 of 2019-nCoV S were cloned upstream of a C-terminal HRV3C protease  
129 cleavage site, a monomeric Fc tag and an 8XHisTag. Similarly, to express the SARS-CoV RBD-  
130 SD1, residues 306–577 of SARS-CoV S (Urbani strain) were cloned upstream of a C-terminal  
131 HRV3C protease cleavage site, a monomeric Fc tag and an 8XHisTag. Lastly, a plasmid  
132 encoding residues 1–615 of human ACE2 with a C-terminal HRV3C protease cleavage site, a  
133 TwinStrepTag and an 8XHisTag was generated.

134 These expression vectors were used to transiently transfect FreeStyle293F cells (Thermo  
135 Fischer) using polyethylenimine. Protein was purified from filtered cell supernatants using either  
136 StrepTactin resin (IBA) or Protein A resin (Pierce) before being subjected to additional  
137 purification by size-exclusion chromatography using either a Superose 6 10/300 column (GE  
138 Healthcare) or a Superdex 200 10/300 Increase column (GE Healthcare) in 2 mM Tris pH 8.0,  
139 200 mM NaCl and 0.02% NaN<sub>3</sub>. ACE2 and the 2019-nCoV RBD-SD1 were incubated with 10%  
140 (wt/wt) HRV3C protease for 2 hours at room temperature. Cleaved protein was then passed over  
141 either NiNTA resin (ACE2) or Protein A and NiNTA resins (2019-nCoV RBD) to remove  
142 cleaved tags and His-tagged protease before being run over a Superdex 200 10/300 Increase  
143 column in 2 mM Tris pH 8.0, 200 mM NaCl and 0.02% NaN<sub>3</sub>.



144 Plasmids encoding the heavy and light chains of S230, 80R and m396 IgG were transiently  
145 transfected into Expi293 (Thermo Fischer) using polyethylenimine. Antibodies were purified  
146 from cell supernatants using Protein A resin before being used for biolayer interferometry.

147 *Cryo-EM sample preparation and data collection*

148 Purified 2019-nCoV S was diluted to a concentration of 0.35 mg/mL in 2 mM Tris pH 8.0, 200  
149 mM NaCl and 0.02% NaN<sub>3</sub>. 3 uL of protein was deposited on a CF-1.2/1.3 grid that had been  
150 plasma cleaned for 30 seconds in a Solarus 950 plasma cleaner (Gatan) with a 4:1 ratio of O<sub>2</sub>/H<sub>2</sub>.  
151 Excess protein was blotted away for 6 seconds before being plunge frozen into liquid ethane  
152 using a Vitrobot Mark IV (Thermo Scientific). Frozen grids were imaged in a Titan Krios  
153 (Thermo Scientific) equipped with a K3 detector (Gatan). Movies were collected using Legion  
154 (31) at a magnification of x22,500, corresponding to a calibrated pixel size of 1.047 Å/pixel. A  
155 full description of the cryo-EM data collection parameters can be found in **Supplementary**  
156 **Table 1**.

157 *Cryo-EM data processing*

158 Motion correction, CTF-estimation and non-templated particle picking were performed in Warp  
159 (32). Extracted particles were imported into cryoSPARC v2.12.4 (15) for 2D classification, 3D  
160 classification and non-uniform 3D refinement. The C1 RBD “up” reconstruction was sharpened  
161 in cryoSPARC, and the 3D reconstruction with C3 symmetry was subjected to local B-factor  
162 sharpening using LocalDeBlur (33). Models were built in Coot, before being iteratively refined  
163 in both Phenix and ISOLDE (34-36). Some of the data processing and refinement software was  
164 curated by SBBGrid (37). The full cryo-EM data processing workflow is described in  
165 **Supplementary Figure 3** and the model refinement statistics can be found in **Supplementary**  
166 **Table 1**.

167 Surface plasmon resonance

168 His-tagged 2019-nCoV S was immobilized to an NiNTA sensorchip (GE Healthcare) to a level  
169 of ~800 response units (RUs) using a Biacore X100 (GE Healthcare) and a running buffer  
170 composed of 10 mM HEPES pH 8.0, 150 mM NaCl and 0.05% Tween 20. Serial dilutions of  
171 purified and untagged ACE2 were injected ranging in concentration from 250 to 15.6 nM. The  
172 resulting data were fit to a 1:1 binding model using Biacore Evaluation Software (GE  
173 Healthcare). His-tagged SARS-CoV RBD-SD1 was immobilized to an NiNTA sensorchip to a  
174 level of ~350 RUs using a Biacore X100 and the same running buffer listed above. Serial  
175 dilutions of purified and untagged ACE2 were injected ranging in concentration from 500 to 31.3  
176 nM. The resulting data were fit to a 1:1 binding model using Biacore Evaluation Software.

177 Negative stain EM

178 Purified 2019-nCoV S was diluted to a concentration of 0.032 mg/mL in 2 mM Tris pH 8.0, 200  
179 mM NaCl and 0.02% NaN<sub>3</sub>. Diluted S protein was mixed with a 1.5-fold molar excess of ACE2  
180 and the mixture was incubated on ice for 1 minute before 4.8 uL of the protein mixture was  
181 deposited on a CF400-Cu grid (Electron Microscopy Sciences) before being stained with  
182 methylamine tungstate (Nanoprobes). This grid was imaged in an FEI Talos TEM (Thermo  
183 Scientific) equipped with a Ceta 16M detector. Micrographs were collected manually using TIA  
184 v4.14 software at a magnification of x92,000, corresponding to a pixel size of 1.63 Å/pixel. CTF  
185 estimation, particle picking and 2D class averaging were performed in *cis*TEM (38).

186 Biolayer interferometry

187 Fc-tagged 2019-nCoV RBD-SD1 was immobilized to an anti-human capture (AHC) sensortip  
188 (FortéBio) using an Octet RED96e (FortéBio). The sensortip was then dipped into 100 nM  
189 ACE2 to measure association before being dipped into a well containing only running buffer

190 composed of 10 mM HEPES pH 7.5, 150 mM NaCl, 3 mM EDTA, 0.05% Tween 20 and 1  
191 mg/mL bovine serum albumin to measure dissociation. Data were reference subtracted and fit to  
192 a 1:1 binding model using Octet Data Analysis Software v11.1 (FortéBio).

193 S230, 80R and m396 IgGs were immobilized to AHC sensortips to a response level of  
194 ~0.8 nm and dipped into wells containing 1  $\mu$ M untagged 2019-nCoV RBD-SD1 before being  
195 dipped into wells containing only running buffer to measure dissociation. Data were reference-  
196 subtracted and aligned to a baseline after IgG capture using Octet Data Analysis software v11.1.  
197 An analogous experiment was performed under identical conditions by dipping AHC sensor tips  
198 loaded with S230, 80R or m396 IgG into untagged SARS-CoV RBD-SD1. Data were reference-  
199 subtracted, aligned to a baseline after IgG capture and fit to a 1:1 binding model using Octet Data  
200 Analysis software v11.1.

## 201 **Acknowledgments**

202 We thank Dr. John Ludes-Meyers for assistance with cell transfection and the rest of the members  
203 of the McLellan laboratory for critical reading of the manuscript. We would also like to thank Dr.  
204 Aguang Dai from the Sauer Structural Biology Laboratory at the University of Texas at Austin for  
205 his assistance with microscope alignment. This work was supported by an NIH/NIAID grant  
206 awarded to J.S.M. (R01-AI127521). The Sauer Structural Biology Laboratory is supported by the  
207 University of Texas College of Natural Sciences and by award RR160023 of the Cancer Prevention  
208 and Research Institute of Texas (CPRIT).

## Figure Legends

**Figure 1. Structure of 2019-nCoV S in the prefusion conformation.** (A) Schematic of 2019-nCoV S primary structure, colored by domain. Domains that were excluded from the ectodomain expression construct or could not be visualized in the final map are colored white. SS= signal sequence, NTD= N-terminal domain, RBD= receptor-binding domain, SD1= subdomain 1, SD2= subdomain 2, S1/S2= S1/S2 protease cleavage site, S2'= S2' protease cleavage site, FP= fusion peptide, HR1= heptad repeat 1, CH= central helix, CD= connector domain, HR2= heptad repeat 2, TM= transmembrane domain, CT= cytoplasmic tail. Arrows denote protease cleavage sites. (B) Select 2D class averages of the particles that were used to calculate the 2019-nCoV S reconstruction (*left*). Side and top views of the prefusion structure of the 2019-nCoV S protein with a single RBD in the “up” conformation (*right*). The two RBD “down” protomers are shown as cryo-EM density in either white or gray and the RBD “up” protomer is shown in ribbons, colored corresponding to the schematic in **Fig 1A**.

**Figure 2. Structural comparison between 2019-nCoV S and SARS-CoV S.** (A) A single RBD “down” monomer of 2019-nCoV S is shown in ribbons, colored according to **Figure 1**. A monomer of SARS-CoV S is also shown in ribbons, colored white (PDB ID: 6CRZ). (B) The following structural domains from 2019-nCoV S have been aligned to their counterparts from SARS-CoV S; NTD (*top left*), RBD (*top right*), SD1 and SD2, (*bottom left*) and S2 (*bottom right*).

**Figure 3. 2019-nCoV S binds human ACE2 with high affinity.** (A) SPR sensorgram showing the binding kinetics for human ACE2 and immobilized 2019-nCoV S. Data are shown as black lines and the best fit of the data to a 1:1 binding model is shown in red. (B) Negative-stain EM 2D

class averages of 2019-nCoV S bound by ACE2. Averages have been rotated so that ACE2 is positioned above the 2019-nCoV S protein with respect to the viral membrane. A cartoon depicting the ACE2-bound 2019-nCoV S protein is shown (*right*) with ACE2 in blue and S protein monomers colored tan, pink and green.

**Figure 4. Antigenicity of the 2019-nCoV RBD.** (A) The SARS-CoV RBD is shown as a white molecular surface (PDB ID: 2AJF), with residues that vary in the 2019-nCoV RBD colored red. The ACE2 binding site is outlined with a black dotted line. (B) A biolayer interferometry sensorgram that shows binding to ACE2 by the 2019-nCoV RBD-SD1. Binding data are shown as a black line and the best fit of the data to a 1:1 binding model is shown in red. (C) Biolayer interferometry to measure cross-reactivity of the SARS-CoV RBD-directed antibodies S230, m396 and 80R. Sensortips with immobilized antibodies were dipped into wells containing 2019-nCoV RBD-SD1 and the resulting data are shown as a black line.

1. J. F. Chan *et al.*, A familial cluster of pneumonia associated with the 2019 novel coronavirus indicating person-to-person transmission: a study of a family cluster. *Lancet*, (2020).
2. C. Huang *et al.*, Clinical features of patients infected with 2019 novel coronavirus in Wuhan, China. *Lancet*, (2020).
3. R. Lu *et al.*, Genomic characterisation and epidemiology of 2019 novel coronavirus: implications for virus origins and receptor binding. *Lancet*, (2020).
4. F. Wu *et al.*, A new coronavirus associated with human respiratory disease in China. *Nature*, (2020).
5. N. Chen *et al.*, Epidemiological and clinical characteristics of 99 cases of 2019 novel coronavirus pneumonia in Wuhan, China: a descriptive study. *Lancet*, (2020).
6. Q. Li *et al.*, Early Transmission Dynamics in Wuhan, China, of Novel Coronavirus-Infected Pneumonia. *N Engl J Med*, (2020).
7. F. Li, Structure, Function, and Evolution of Coronavirus Spike Proteins. *Annu Rev Virol* **3**, 237-261 (2016).
8. B. J. Bosch, R. van der Zee, C. A. de Haan, P. J. Rottier, The coronavirus spike protein is a class I virus fusion protein: structural and functional characterization of the fusion core complex. *J Virol* **77**, 8801-8811 (2003).
9. A. C. Walls *et al.*, Tectonic conformational changes of a coronavirus spike glycoprotein promote membrane fusion. *Proc Natl Acad Sci U S A* **114**, 11157-11162 (2017).
10. M. Gui *et al.*, Cryo-electron microscopy structures of the SARS-CoV spike glycoprotein reveal a prerequisite conformational state for receptor binding. *Cell Res* **27**, 119-129 (2017).
11. J. Pallesen *et al.*, Immunogenicity and structures of a rationally designed prefusion MERS-CoV spike antigen. *Proc Natl Acad Sci U S A* **114**, E7348-E7357 (2017).
12. A. C. Walls *et al.*, Unexpected Receptor Functional Mimicry Elucidates Activation of Coronavirus Fusion. *Cell* **176**, 1026-1039 e1015 (2019).
13. Y. Yuan *et al.*, Cryo-EM structures of MERS-CoV and SARS-CoV spike glycoproteins reveal the dynamic receptor binding domains. *Nat Commun* **8**, 15092 (2017).
14. R. N. Kirchdoerfer *et al.*, Stabilized coronavirus spikes are resistant to conformational changes induced by receptor recognition or proteolysis. *Sci Rep* **8**, 15701 (2018).
15. A. Punjani, J. L. Rubinstein, D. J. Fleet, M. A. Brubaker, cryoSPARC: algorithms for rapid unsupervised cryo-EM structure determination. *Nat Methods* **14**, 290-296 (2017).
16. D. Wrapp, J. S. McLellan, The 3.1-Angstrom Cryo-electron Microscopy Structure of the Porcine Epidemic Diarrhea Virus Spike Protein in the Prefusion Conformation. *J Virol* **93**, (2019).
17. A. C. Walls *et al.*, Glycan shield and epitope masking of a coronavirus spike protein observed by cryo-electron microscopy. *Nat Struct Mol Biol* **23**, 899-905 (2016).
18. R. N. Kirchdoerfer *et al.*, Pre-fusion structure of a human coronavirus spike protein. *Nature* **531**, 118-121 (2016).

19. B. J. Bosch, W. Bartelink, P. J. Rottier, Cathepsin L functionally cleaves the severe acute respiratory syndrome coronavirus class I fusion protein upstream of rather than adjacent to the fusion peptide. *J Virol* **82**, 8887-8890 (2008).
20. I. Glowacka *et al.*, Evidence that TMPRSS2 activates the severe acute respiratory syndrome coronavirus spike protein for membrane fusion and reduces viral control by the humoral immune response. *J Virol* **85**, 4122-4134 (2011).
21. W. Li *et al.*, Angiotensin-converting enzyme 2 is a functional receptor for the SARS coronavirus. *Nature* **426**, 450-454 (2003).
22. S. Belouzard, V. C. Chu, G. R. Whittaker, Activation of the SARS coronavirus spike protein via sequential proteolytic cleavage at two distinct sites. *Proc Natl Acad Sci USA* **106**, 5871-5876 (2009).
23. J. Chen *et al.*, Structure of the hemagglutinin precursor cleavage site, a determinant of influenza pathogenicity and the origin of the labile conformation. *Cell* **95**, 409-417 (1998).
24. M. K.-W. Hoffmann, H.; Krüger, N.; Müller, M.; Drosten, C.; Pöhlmann, S., The novel coronavirus 2019 (2019-nCoV) uses the SARS-coronavirus receptor ACE2 and the cellular protease TMPRSS2 for entry into target cells. *BioRxiv*, (2020).
25. Y. Wan, J. Shang, R. Graham, R. S. Baric, F. Li, Receptor recognition by novel coronavirus from Wuhan: An analysis based on decade-long structural studies of SARS. *J Virol*, (2020).
26. P. Zhou *et al.*, A pneumonia outbreak associated with a new coronavirus of probable bat origin. *Nature*, (2020).
27. W. Song, M. Gui, X. Wang, Y. Xiang, Cryo-EM structure of the SARS coronavirus spike glycoprotein in complex with its host cell receptor ACE2. *PLoS Pathog* **14**, e1007236 (2018).
28. W. C. Hwang *et al.*, Structural basis of neutralization by a human anti-severe acute respiratory syndrome spike protein antibody, 80R. *J Biol Chem* **281**, 34610-34616 (2006).
29. P. Prabakaran *et al.*, Structure of severe acute respiratory syndrome coronavirus receptor-binding domain complexed with neutralizing antibody. *J Biol Chem* **281**, 15829-15836 (2006).
30. X. L. Tian, C.; Huang, A.; Xia, S.; Lu, S.; Shi, Z.; Lu, L.; Jiang, S.; Yang, Z.; Wu, Y.; Ying, T., Potent binding of 2019 novel coronavirus spike protein by a SARS coronavirus-specific human monoclonal antibody. *BioRxiv*, (2020).
31. B. Carragher *et al.*, Leginon: an automated system for acquisition of images from vitreous ice specimens. *J Struct Biol* **132**, 33-45 (2000).
32. D. Tegunov, P. Cramer, Real-time cryo-electron microscopy data preprocessing with Warp. *Nat Methods* **16**, 1146-1152 (2019).
33. E. Ramirez-Aportela *et al.*, Automatic local resolution-based sharpening of cryo-EM maps. *Bioinformatics*, (2019).
34. P. D. Adams *et al.*, PHENIX: building new software for automated crystallographic structure determination. *Acta Crystallogr D Biol Crystallogr* **58**, 1948-1954 (2002).
35. T. I. Croll, ISOLDE: a physically realistic environment for model building into low-resolution electron-density maps. *Acta Crystallogr D Struct Biol* **74**, 519-530 (2018).
36. P. Emsley, K. Cowtan, Coot: model-building tools for molecular graphics. *Acta Crystallogr D Biol Crystallogr* **60**, 2126-2132 (2004).
37. A. Morin *et al.*, Collaboration gets the most out of software. *Elife* **2**, e01456 (2013).

38. T. Grant, A. Rohou, N. Grigorieff, cisTEM, user-friendly software for single-particle image processing. *Elife* **7**, (2018).



Figure 1

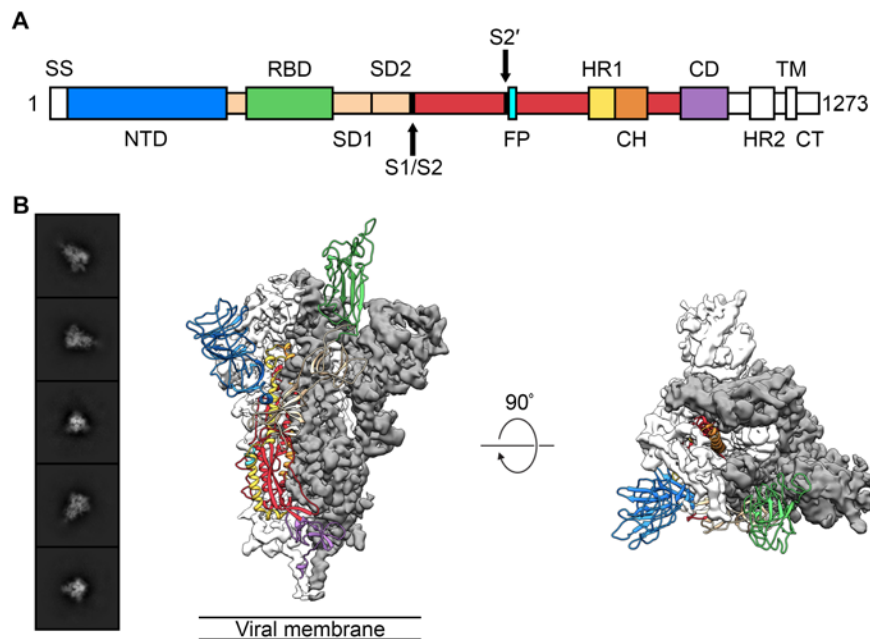

**Figure 1. Structure of 2019-nCoV S in the prefusion conformation.** (A) Schematic of 2019-nCoV S primary structure, colored by domain. Domains that were excluded from the ectodomain expression construct or could not be visualized in the final map are colored white. SS= signal sequence, NTD= N-terminal domain, RBD= receptor-binding domain, SD1= subdomain 1, SD2= subdomain 2, S1/S2= S1/S2 protease cleavage site, S2'= S2' protease cleavage site, FP= fusion peptide, HR1= heptad repeat 1, CH= central helix, CD= connector domain, HR2= heptad repeat 2, TM= transmembrane domain, CT= cytoplasmic tail. Arrows denote protease cleavage sites. (B) Select 2D class averages of the particles that were used to calculate the 2019-nCoV S reconstruction (*left*). Side and top views of the prefusion structure of the 2019-nCoV S protein with a single RBD in the “up” conformation (*right*). The two RBD “down” protomers are shown as cryo-EM density in either white or gray and the RBD “up” protomer is shown in ribbons, colored corresponding to the schematic in **Fig 1A**.

Figure 2

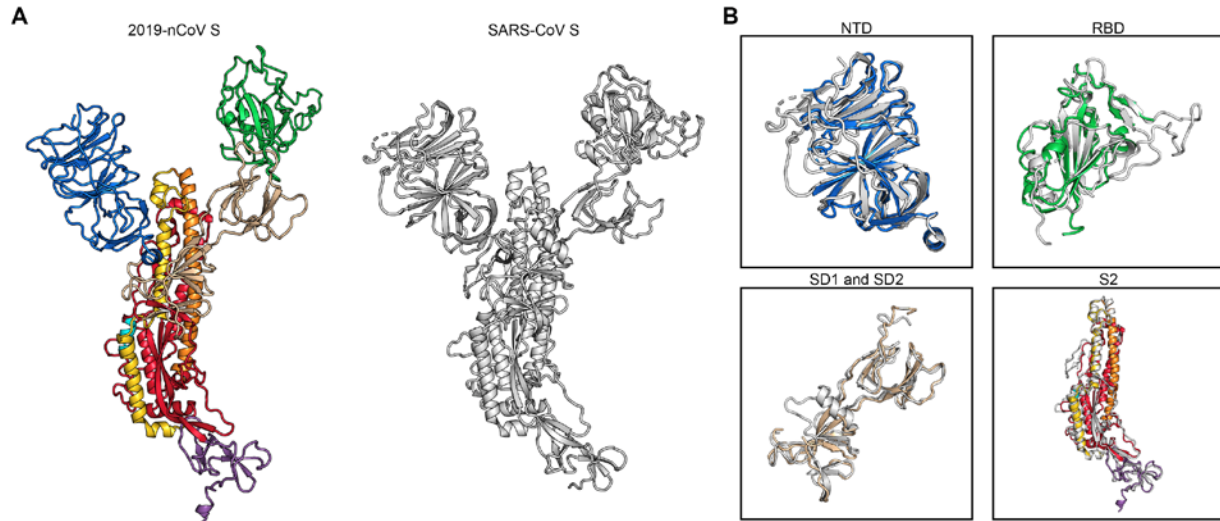

**Figure 2. Structural comparison between 2019-nCoV S and SARS-CoV S.** (A) A single RBD “down” monomer of 2019-nCoV S is shown in ribbons, colored according to **Figure 1**. A monomer of SARS-CoV S is also shown in ribbons, colored white (PDB ID: 6CRZ). (B) The following structural domains from 2019-nCoV S have been aligned to their counterparts from SARS-CoV S; NTD (*top left*), RBD (*top right*), SD1 and SD2, (*bottom left*) and S2 (*bottom right*).

Figure 3

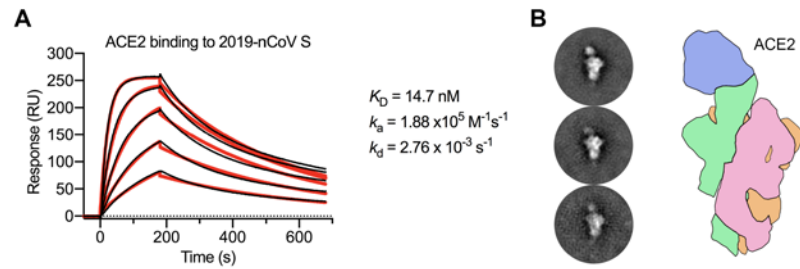

**Figure 3. 2019-nCoV S binds human ACE2 with high affinity.** (A) SPR sensorgram showing the binding kinetics for human ACE2 and immobilized 2019-nCoV S. Data are shown as black lines and the best fit of the data to a 1:1 binding model is shown in red. (B) Negative-stain EM 2D class averages of 2019-nCoV S bound by ACE2. Averages have been rotated so that ACE2 is positioned above the 2019-nCoV S protein with respect to the viral membrane. A cartoon depicting the ACE2-bound 2019-nCoV S protein is shown (*right*) with ACE2 in blue and S protein monomers colored tan, pink and green.

Figure 4

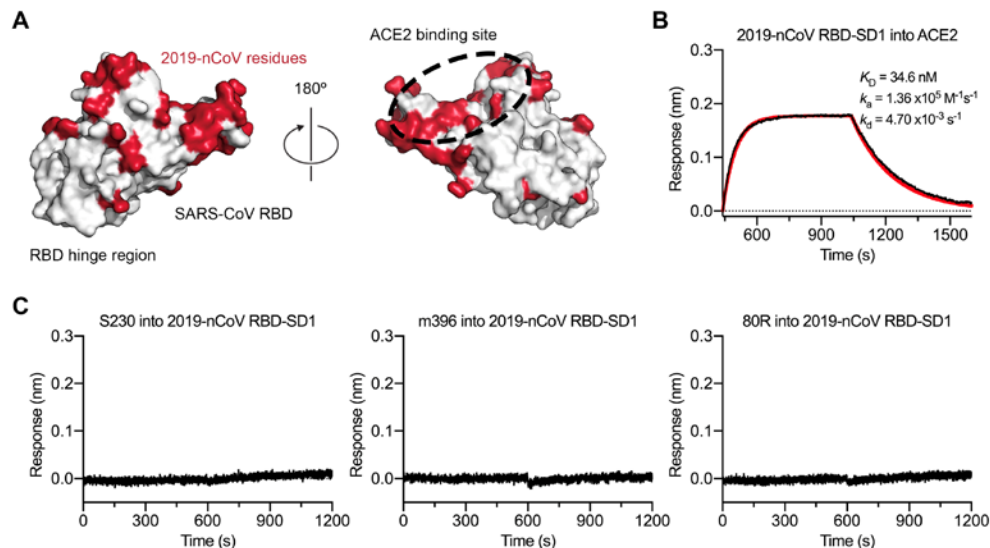

**Figure 4. Antigenicity of the 2019-nCoV RBD.** (A) The SARS-CoV RBD is shown as a white molecular surface (PDB ID: 2AJF), with residues that vary in the 2019-nCoV RBD colored red. The ACE2 binding site is outlined with a black dotted line. (B) A biolayer interferometry sensorgram that shows binding to ACE2 by the 2019-nCoV RBD-SD1. Binding data are shown as a black line and the best fit of the data to a 1:1 binding model is shown in red. (C) Biolayer interferometry to measure cross-reactivity of the SARS-CoV RBD-directed antibodies S230, m396 and 80R. Sensortips with immobilized antibodies were dipped into wells containing 2019-nCoV RBD-SD1 and the resulting data are shown as a black line.

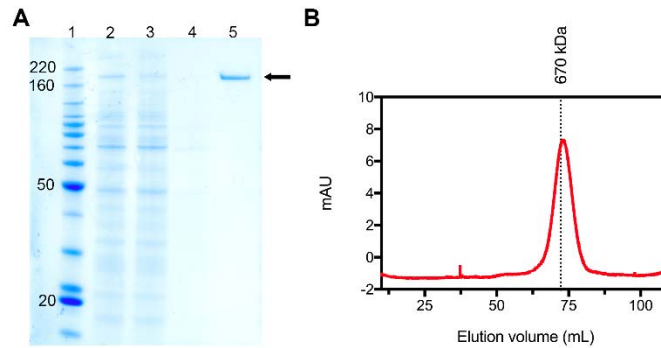

**Supplementary Figure 1. 2019-nCoV S expression and purification.** (A) SDS-PAGE analysis of the 2019-nCoV S protein. Lane 1: molecular weight ladder, with relevant bands labeled in kilodaltons (*left*); lane 2: filtered supernatant from transfected cells; lane 3: supernatant after passing through StrepTactin resin; lane 4: wash of StrepTactin resin; lane 5: elution from StrepTactin resin. The band corresponding to 2019-nCoV S is denoted with a black arrow. (B) Size-exclusion chromatogram of the affinity-purified 2019-nCoV S protein. Data from a Superose 6 10/300 column are shown in red. The elution volume of a 670 kilodalton molecular weight standard is shown as a black dotted line.

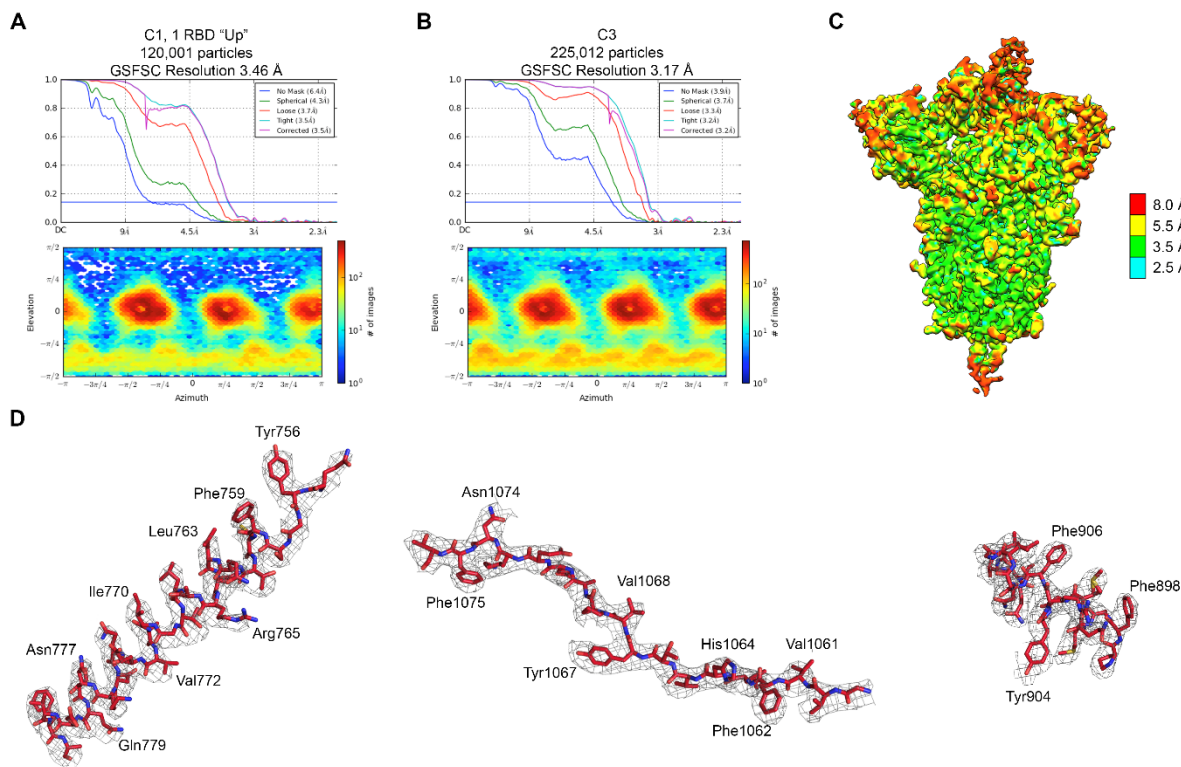

**Supplementary Figure 2. Cryo-EM structure validation.** (A) FSC curves (*top*) and the viewing direction distribution plot (*bottom*) for 2019-nCoV S with a single RBD “up”. (B) FSC curves (*top*) and the viewing direction distribution plot (*bottom*) for the 2019-nCoV S processed with C3 symmetry. (C) The cryo-EM density of the 2019-nCoV S with a single RBD “up” is shown, colored according to local resolution. (D) Density from S2 of the C3-refined 2019-nCoV S structure. Residues are shown as sticks, colored according to **Figure 1A** with oxygen atoms colored red, nitrogens colored blue and sulfurs colored yellow. The cryo-EM density map is shown as a gray mesh.

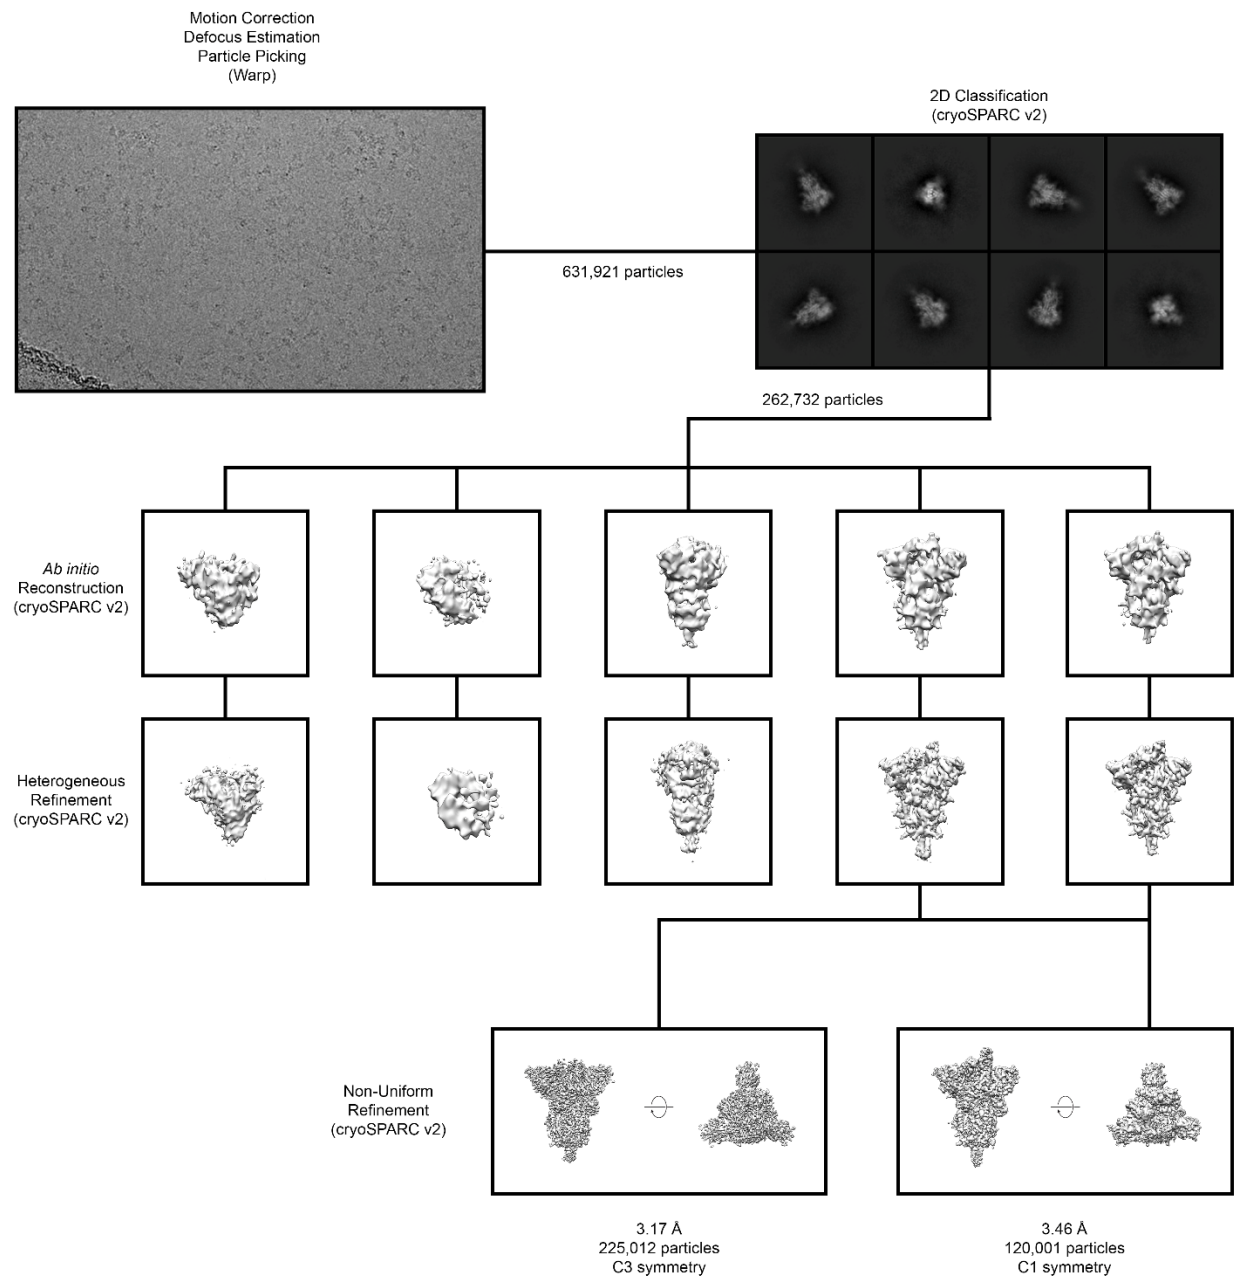

**Supplementary Figure 3. Cryo-EM data processing workflow.**

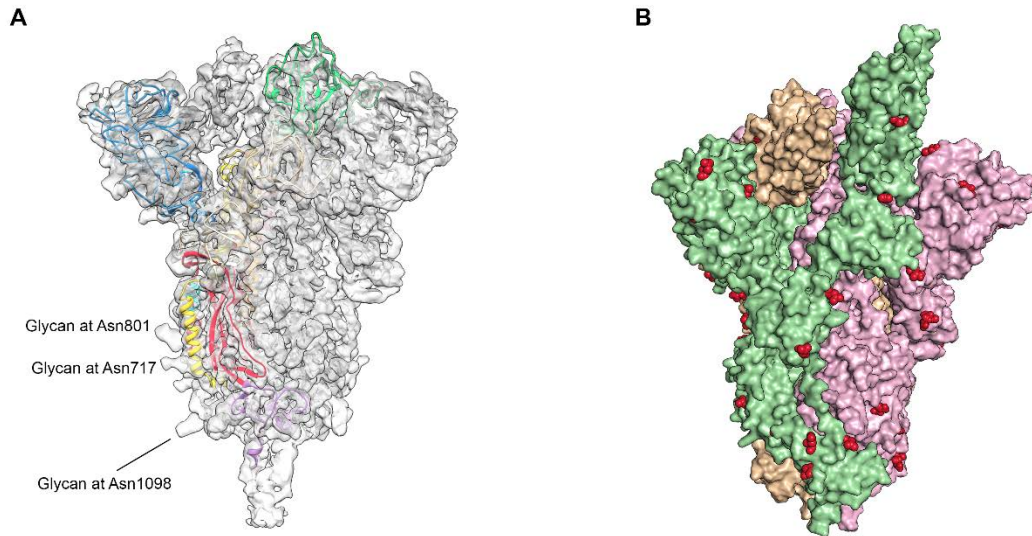

**Supplementary Figure 4. Cryo-EM map and *N*-linked glycosylation sites.** (A) The unsharpened cryo-EM density map for the C3-processed 2019-nCoV S is shown as a transparent molecular surface, with a single protomer fit into the map shown in ribbons and colored according to **Figure 1A**. Some S2 density that corresponds to *N*-linked glycans is labeled. (B) The 2019-nCoV S trimer is shown as a molecular surface with each protomer colored green, pink or tan. Asparagine residues that correspond to *N*-linked glycosylation sites are shown as red spheres.



|           |                              |      |  |
|-----------|------------------------------|------|--|
| 2019-nCoV | -----MEVFLVLLPLVSSQ-----C    | 67   |  |
| SARS-CoV  | -----MFIFLLFLITLTSCLDLDRC    | 71   |  |
| RaTG13    | MFLLLTRKRMVFLVLLPLVSSQ-----C | 76   |  |
| 2019-nCoV | LHVSQTNGIKRFDNVLEFNDGVYFAS   | 147  |  |
| SARS-CoV  | IN-----HIFGNPVIIPKDGIIYFAA   | 144  |  |
| RaTG13    | LHVSQTNGIKRFDNVLEFNDGVYFAS   | 156  |  |
| 2019-nCoV | NKSMWSEFRVYSSANNCTFEYVSQ     | 227  |  |
| SARS-CoV  | GTQ---THTMIFDANCTFEYISDAF    | 220  |  |
| RaTG13    | NKSMWSEFRVYSSANNCTFEYVSQ     | 236  |  |
| 2019-nCoV | DLPIGINITRFQTLALHRSYLT       | 307  |  |
| SARS-CoV  | KLPLGINITNFRALITAFS-----     | 294  |  |
| RaTG13    | DLPIGINITRFQTLALHRSYLT       | 316  |  |
| 2019-nCoV | VEKGIYQTSNFRVQPTESIVRF       | 387  |  |
| SARS-CoV  | IDKGIYQTSNFRVQPTESIVRF       | 374  |  |
| RaTG13    | VEKGIYQTSNFRVQPTESIVRF       | 396  |  |
| 2019-nCoV | NDLCFINVDYADSVIRGDEVQIAP     | 467  |  |
| SARS-CoV  | NDFCFINVDYADSVIRGDEVQIAP     | 454  |  |
| RaTG13    | NDLCFINVDYADSVIRGDEVQIAP     | 476  |  |
| 2019-nCoV | ISTEYIQAQSTPCNGVEGFNCY       | 547  |  |
| SARS-CoV  | ISNVFSPDGKPCIP-FALNICYW      | 533  |  |
| RaTG13    | ISTEYIQAQSTPCNGVEGFNCY       | 556  |  |
| 2019-nCoV | GTGVLTESNKKFLPFQGFGRD        | 627  |  |
| SARS-CoV  | GTGVLTPSSKRFQFPQGFGRD        | 613  |  |
| RaTG13    | GTGVLTESNKKFLPFQGFGRD        | 636  |  |
| 2019-nCoV | QLTPWRVYSTGSNVQFTRAGCL       | 707  |  |
| SARS-CoV  | QLTPAWRIYSTGNVQFTRAGCL       | 689  |  |
| RaTG13    | QLTPWRVYSTGSNVQFTRAGCL       | 712  |  |
| 2019-nCoV | SNNSIAIPTNFTISVTEILP         | 787  |  |
| SARS-CoV  | SNNTIAIPTNFTISITTEVMP        | 769  |  |
| RaTG13    | SNNSIAIPTNFTISVTEILP         | 792  |  |
| 2019-nCoV | IYKTPPIKDFGGFNFSQILP         | 867  |  |
| SARS-CoV  | MYKTPILKYFGGFNFSQILP         | 849  |  |
| RaTG13    | IYKTPPIKDFGGFNFSQILP         | 872  |  |
| 2019-nCoV | EMIAQYTSALLAGTITSGWT         | 947  |  |
| SARS-CoV  | DMIAAYTAALVSGTATAGWTF        | 929  |  |
| RaTG13    | EMIAQYTSALLAGTITSGWT         | 952  |  |
| 2019-nCoV | LQDVVNQNAQAINTLVKQL          | 1027 |  |
| SARS-CoV  | LQDVVNQNAQAINTLVKQL          | 1009 |  |
| RaTG13    | LQDVVNQNAQAINTLVKQL          | 1032 |  |
| 2019-nCoV | KMSECVLQSKRVDFCGKGY          | 1107 |  |
| SARS-CoV  | KMSECVLQSKRVDFCGKGY          | 1089 |  |
| RaTG13    | KMSECVLQSKRVDFCGKGY          | 1112 |  |
| 2019-nCoV | NFYEPQIITIDNTEVSGNCD         | 1187 |  |
| SARS-CoV  | NFESPQIITIDNTEVSGNCD         | 1169 |  |
| RaTG13    | NFYEPQIITIDNTEVSGNCD         | 1192 |  |
| 2019-nCoV | EVAKNLESIDLQELGKYEQY         | 1267 |  |
| SARS-CoV  | EVAKNLESIDLQELGKYEQY         | 1249 |  |
| RaTG13    | EVAKNLESIDLQELGKYEQY         | 1272 |  |
| 2019-nCoV | VKLHYT                       | 1273 |  |
| SARS-CoV  | VKLHYT                       | 1255 |  |
| RaTG13    | VKLHYT                       | 1278 |  |

■ NTD  
■ RBD  
■ FP  
■ HR1  
■ CH  
■ CD

## Supplementary Figure 5. Sequence alignment of 2019-nCoV S, SARS-CoV S and RaTG13 S.

Identical residues are denoted by an “\*” beneath the consensus position. Structural domains are colored according to Figure 1A.

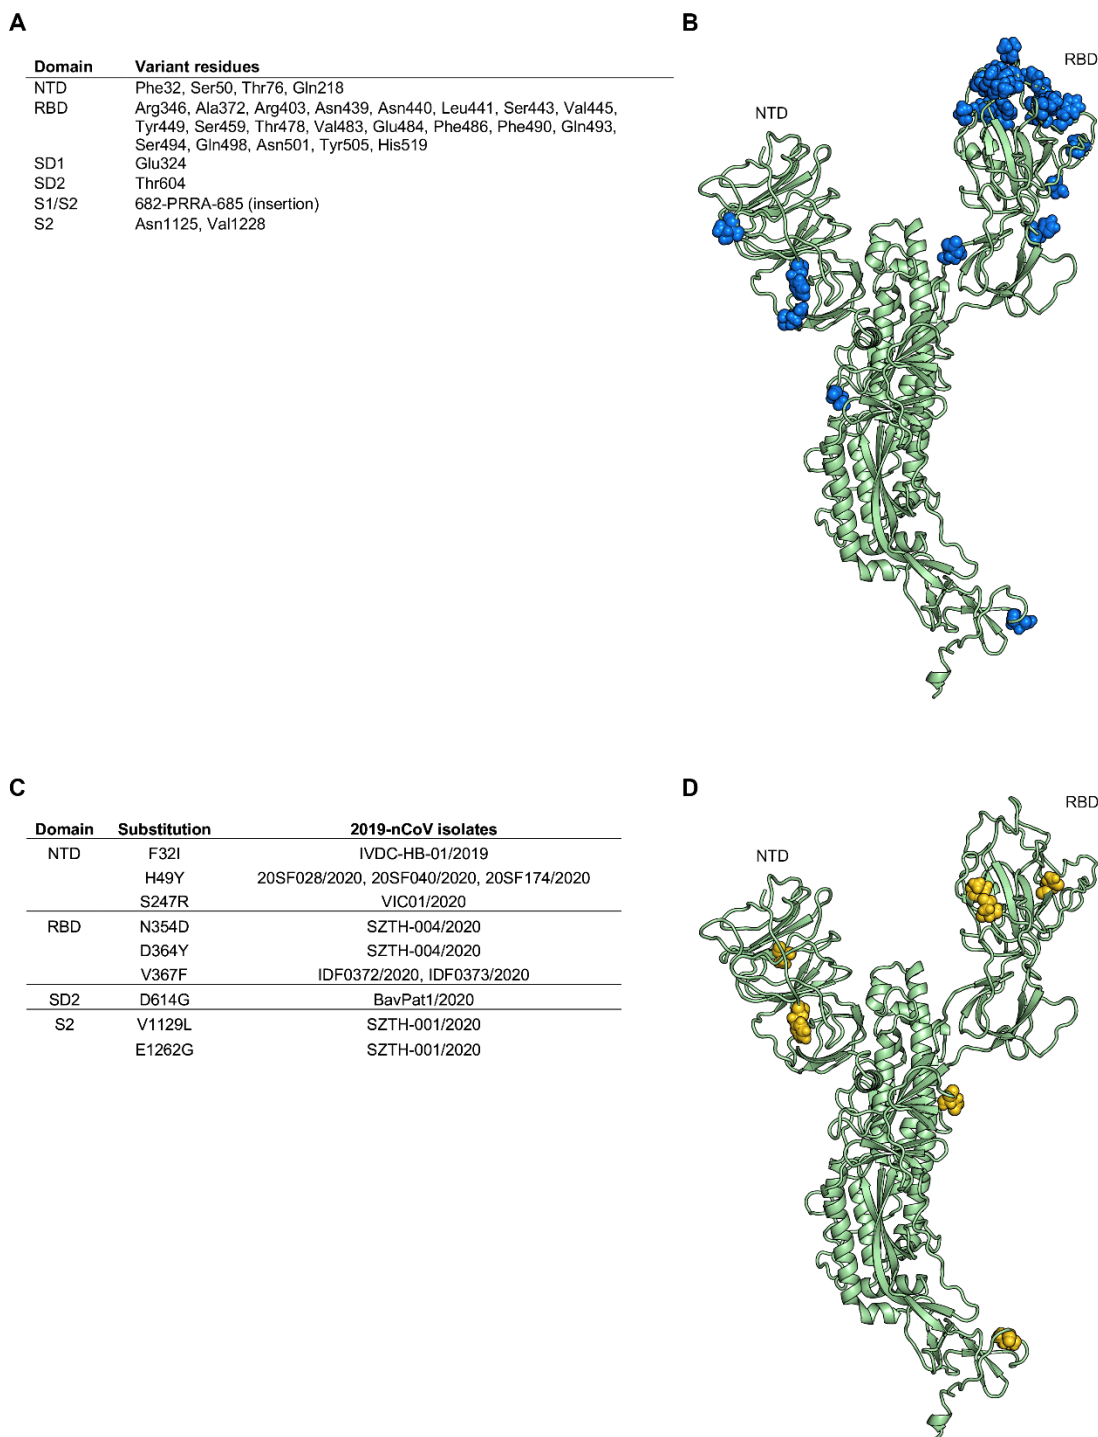

**Supplementary Figure 6. Sequence variability between RaTG13 S and 2019-nCoV S clinical isolates. (A)**

Table shows residues in the 2019-nCoV S protein that vary in RaTG13, grouped by structural domain. **(B)** A single monomer of the 2019-nCoV S protein is shown in ribbons, colored green. RaTG13 variant residues are shown as blue spheres. **(C)** Table shows variations in the 2019-nCoV S sequence based on 61 clinical isolates and the domains wherein these variations occur. **(D)** A single monomer of the 2019-nCoV S protein is shown in ribbons, colored green. Variant residues are shown as gold spheres.

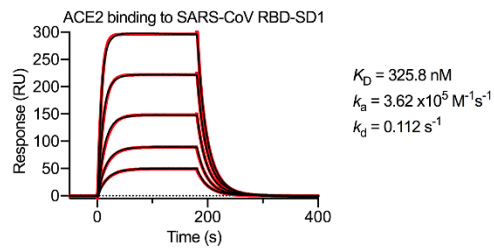

**Supplementary Figure 7. SARS-CoV RBD-SD1 binding to human ACE2.** An SPR sensorgram is shown, displaying the binding between soluble human ACE2 and immobilized SARS-CoV RBD-SD1. The data are shown as black lines and the best fit of the data to a 1:1 binding model is shown in red.

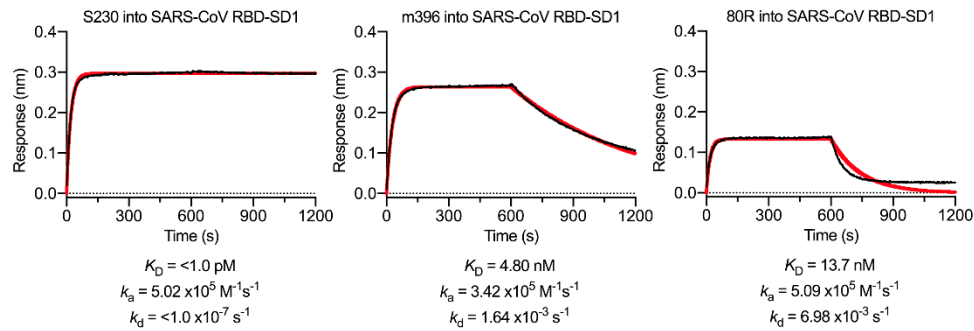

**Supplementary Figure 8. SARS-CoV RBD-directed antibody validation.** The monoclonal antibodies that were tested for cross-reactivity to the 2019-nCoV RBD-SD1 were also tested for binding to the SARS-CoV S RBD-SD1 as a positive control. Binding data are shown as a black line and the best fit of the data to a 1:1 binding model is shown in red.

## Supplementary Table 1. Cryo-EM data collection and refinement statistics.

### EM data collection and reconstruction statistics

| Protein                                    | 2019-nCoV S 1 RBD "up" | 2019-nCoV S C3 symmetry |
|--------------------------------------------|------------------------|-------------------------|
| EMDB                                       | EMD-21375              | EMD-21374               |
| Microscope                                 | FEI Titan Krios        | FEI Titan Krios         |
| Voltage (kV)                               | 300                    | 300                     |
| Detector                                   | Gatan K3               | Gatan K3                |
| Exposure (e <sup>-</sup> /Å <sup>2</sup> ) | 36                     | 36                      |
| Defocus range (μm)                         | 0.8–2.8                | 0.8–2.8                 |
| Final particles                            | 120,001                | 225,012                 |
| Symmetry imposed                           | n/a (C1)               | C3                      |
| Resolution (Å)                             | 3.46                   | 3.17                    |

### Model refinement and validation statistics

|                      |       |
|----------------------|-------|
| PDB                  | 6VSB  |
| Composition          |       |
| Amino acids          | 2,905 |
| Glycans              | 61    |
| RMSD bonds (Å)       | 0.004 |
| RMSD angles (°)      | 0.88  |
| Ramachandran         |       |
| Favored (%)          | 94.6  |
| Allowed (%)          | 5.2   |
| Outliers (%)         | 0.2   |
| Rotamer outliers (%) | 0.64  |
| Clash score          | 12.8  |
| MolProbity score     | 1.99  |

**Supplementary Movie 1.** CryoSPARC 3D variability analysis. 2019-nCoV S trimer viewed from the side, along the viral membrane.

**Supplementary Movie 2.** CryoSPARC 3D variability analysis. 2019-nCoV S trimer viewed from the top, toward the viral membrane.
